# Supplementary material for: Strategies and Patterns of Codon Bias in Molluscum Contagiosum Virus
Source: MDPI journal article supplement (doi:10.3390/pathogens10121649), 2021-12-20
Supplement: s1 [file s1]

MH320547 (MCV 1)

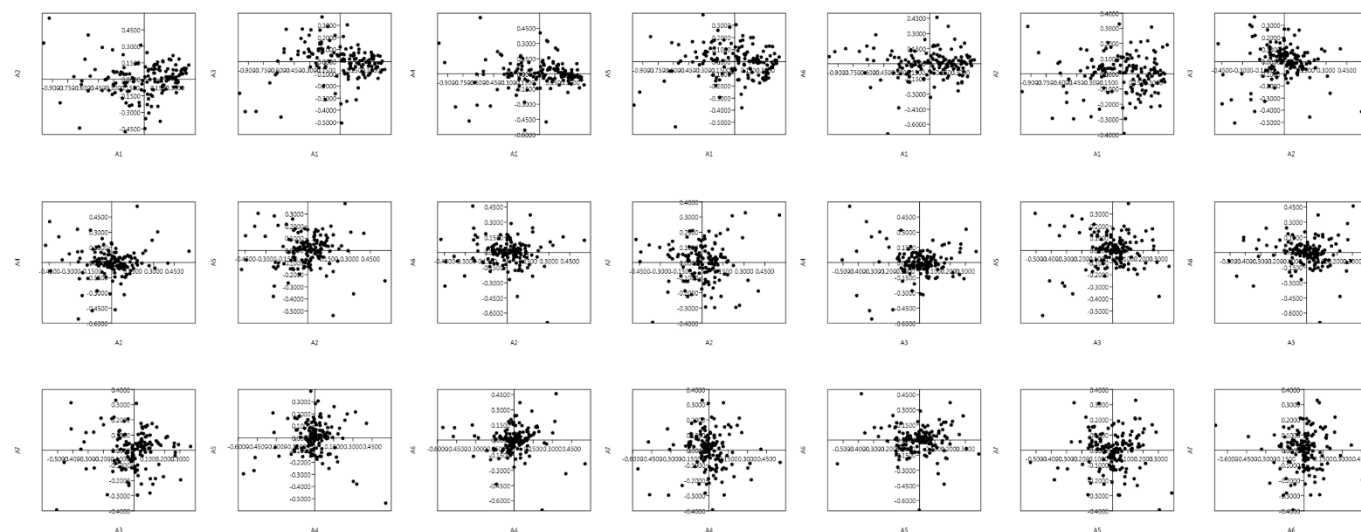

**Figure S1.** Coding sequences of MH320547.

## MH320552 (MCV 1)

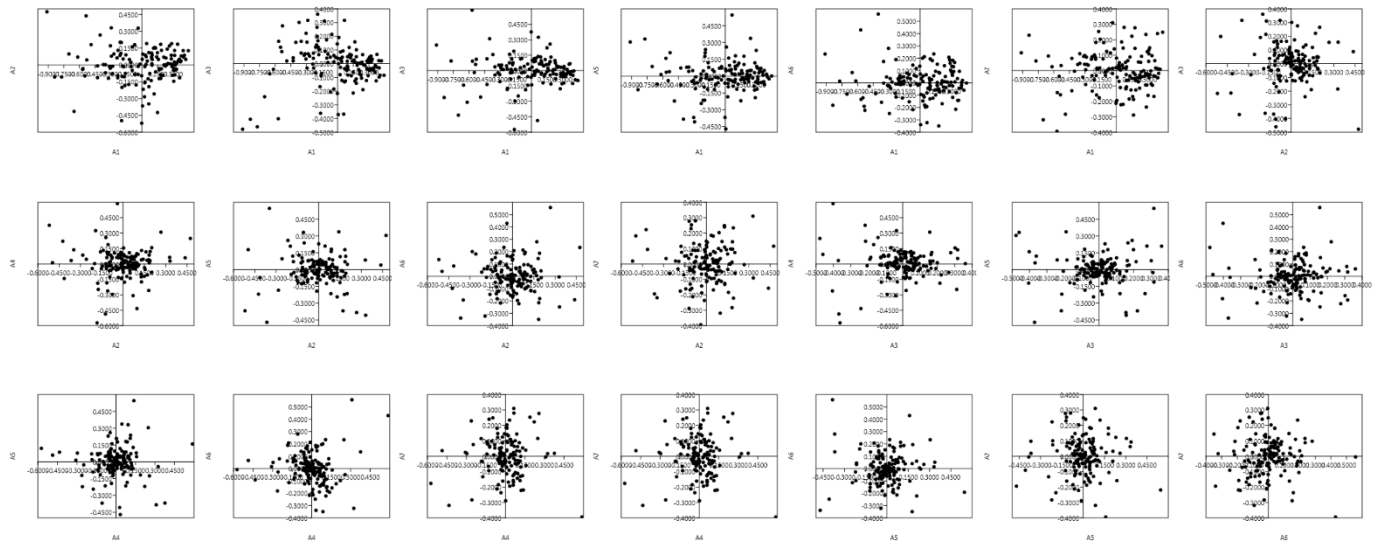

## MH320553 (MCV 1)

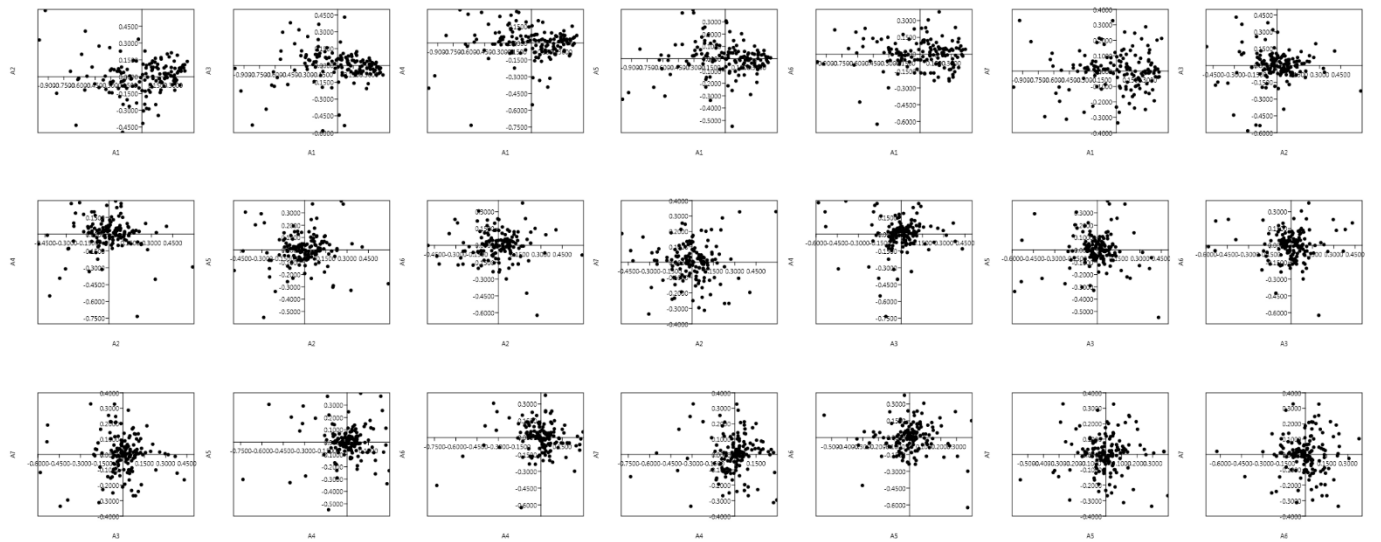

Figure S2. Coding sequences of MH320552 and MH320553.

## MH320554 (MCV 1)

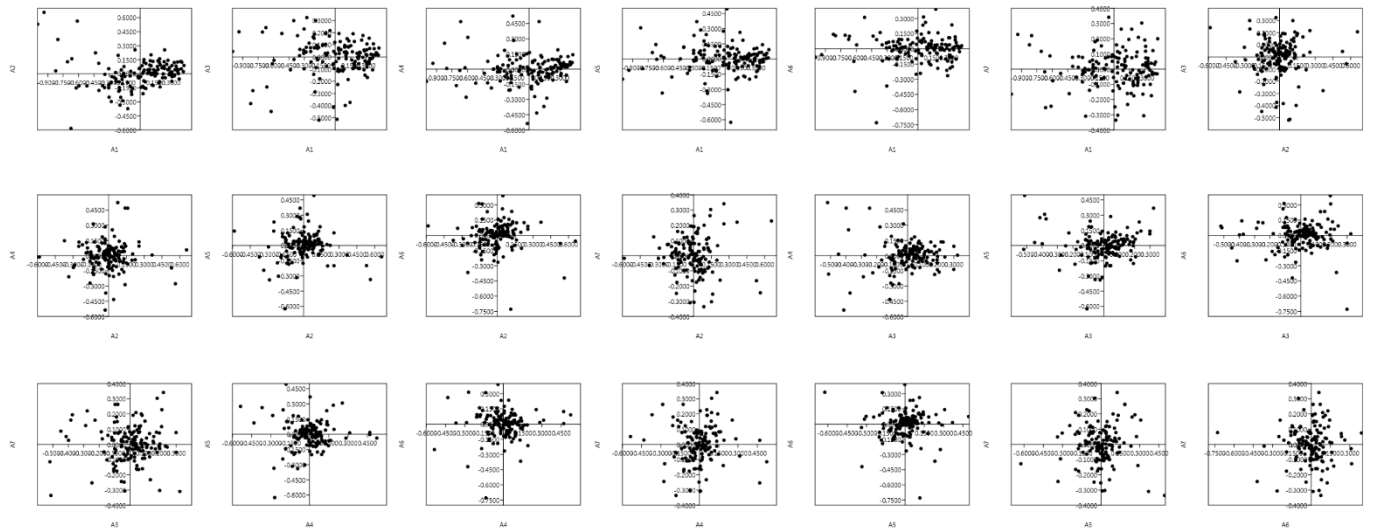

## MH320555 (MCV 1)

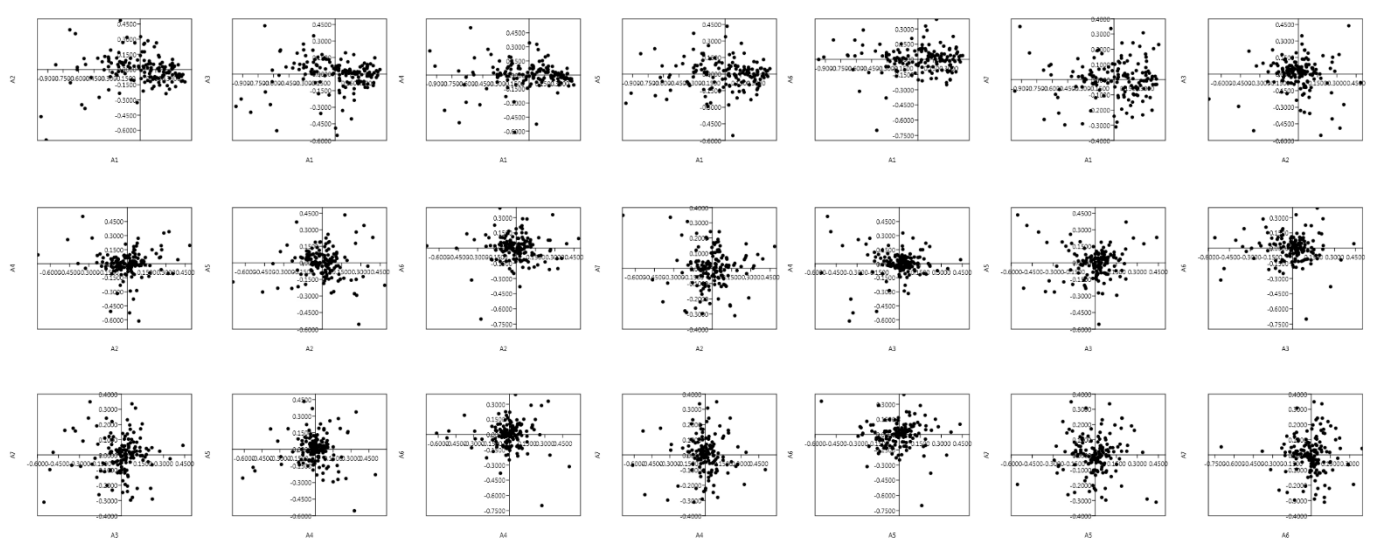

Figure S3. Coding sequences of MH320554 and MH320555.

## KY040275 (MCV 1)

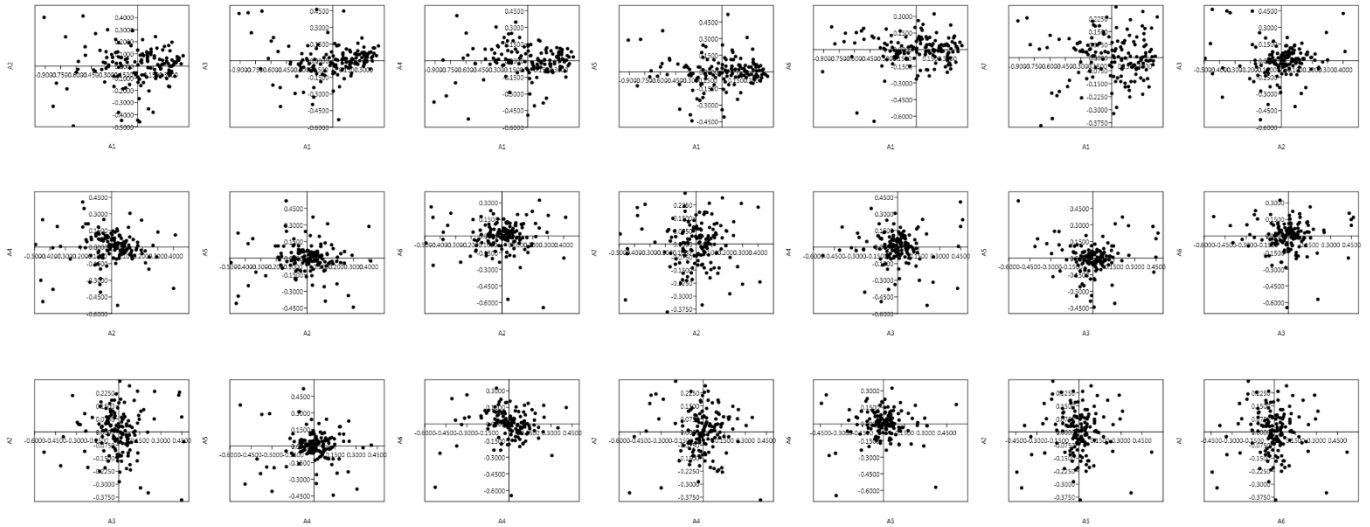

## KY040276 (MCV 1)

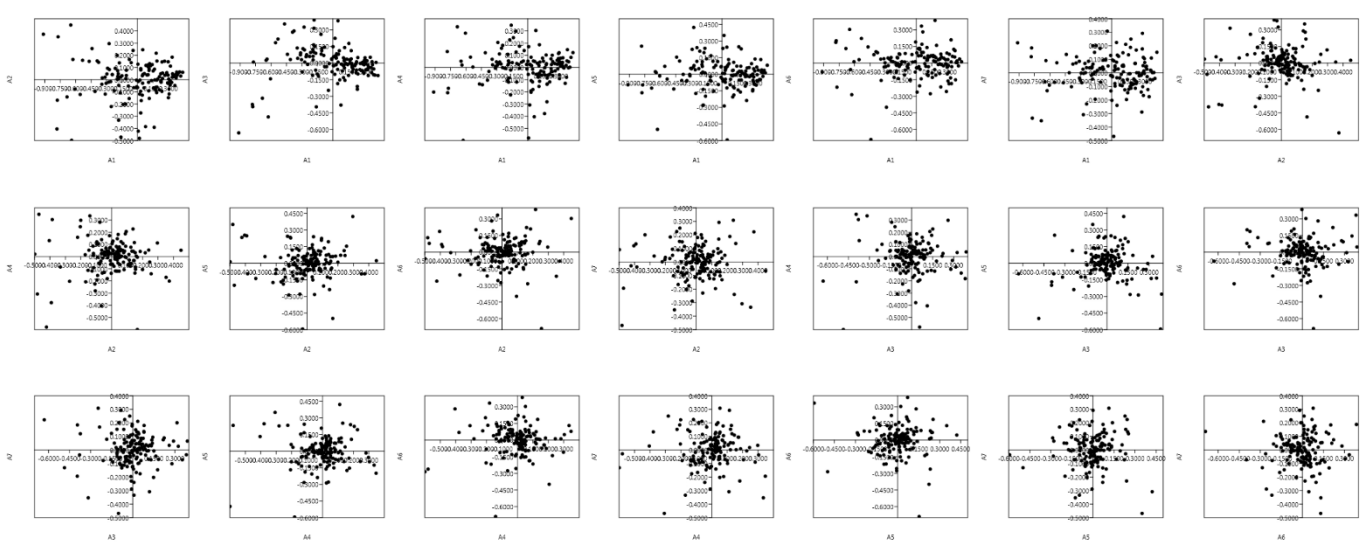

Figure S4. Coding sequences of KY040275 and KY040276.

## KY040277 (MCV 1)

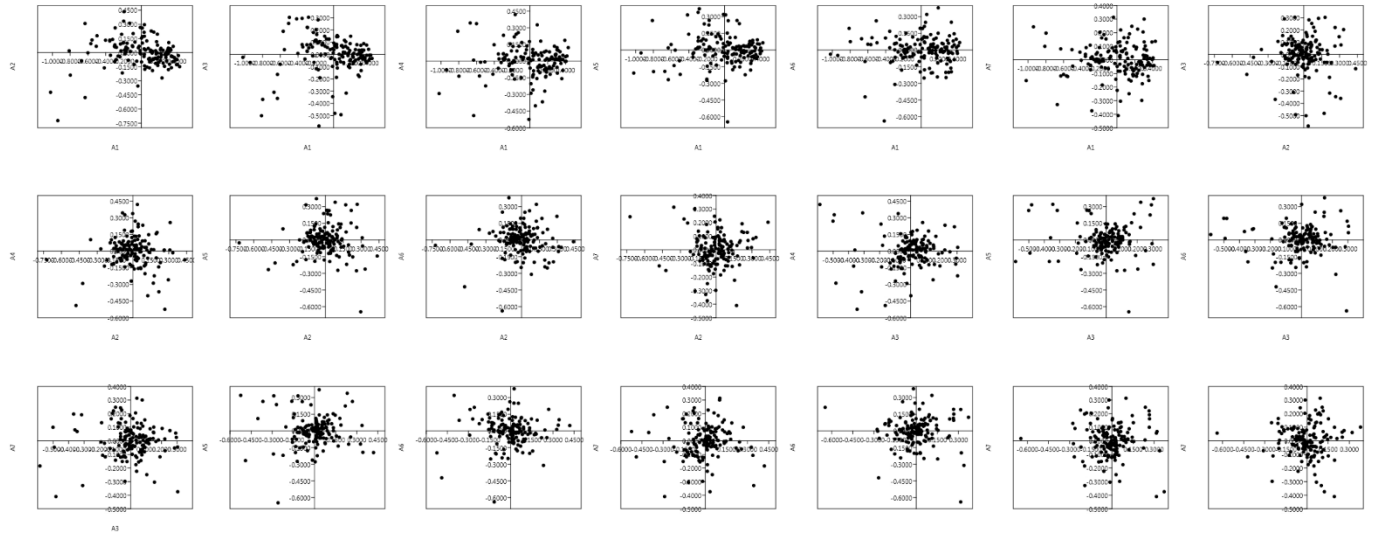

## U60315 (MCV 1)

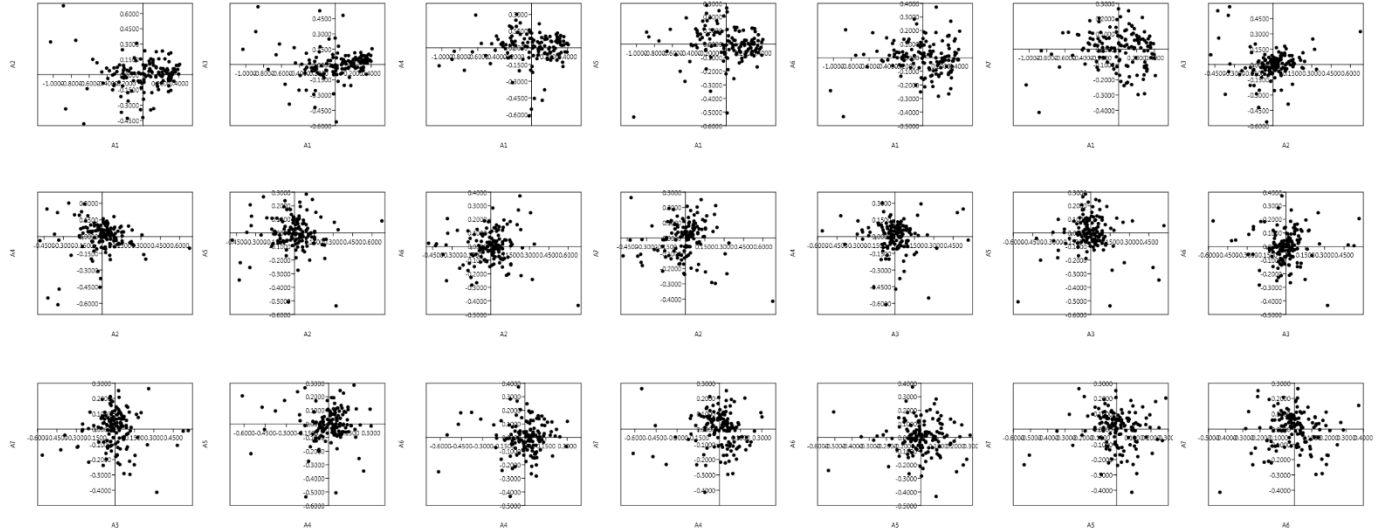

Figure S5. Coding sequences of KY040277 and U60315.

## MH320548 (MCV 2)

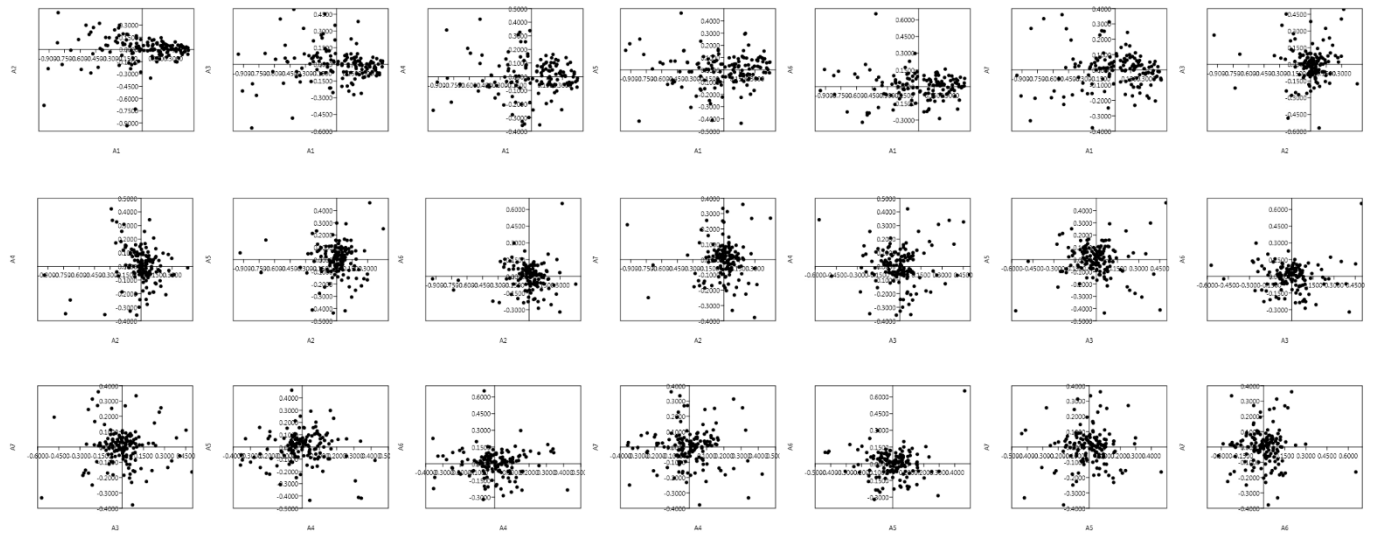

## MH320549 (MCV 2)

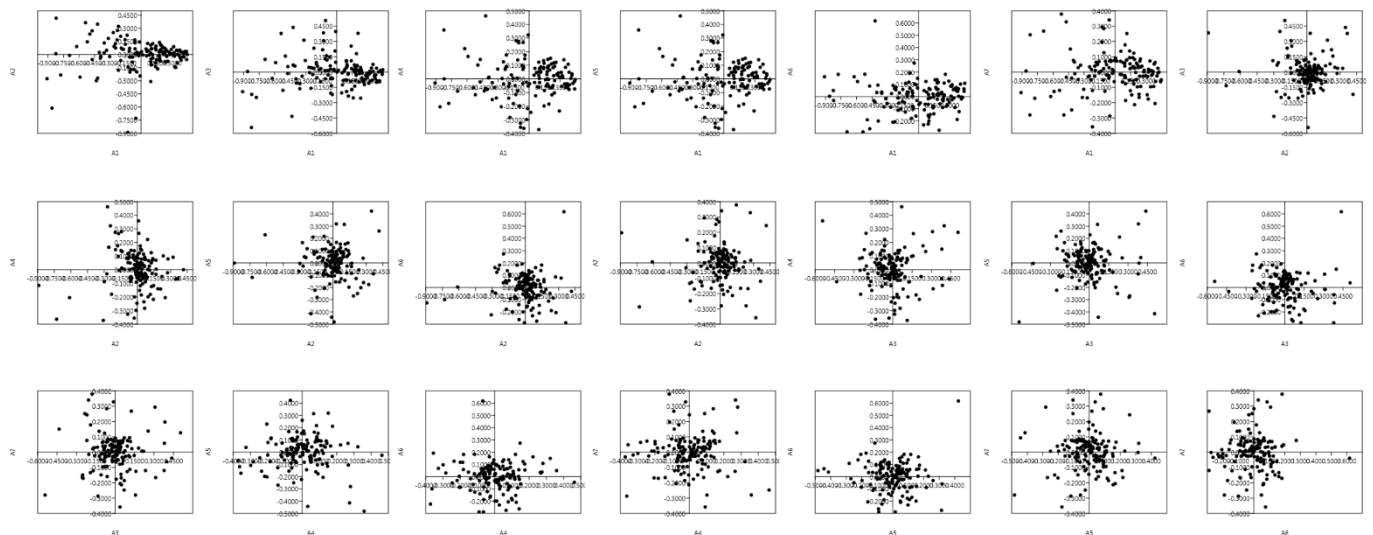

Figure S6. Coding sequences of MH320548 and MH320549.

**MH320551 (MCV 2)**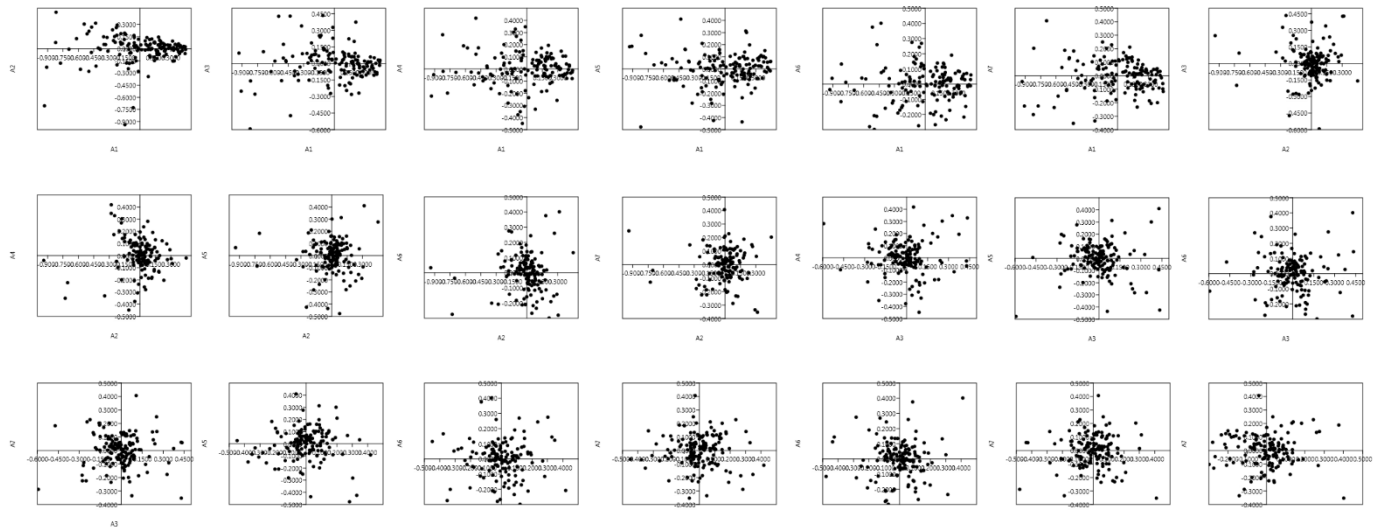**MH320550 (MCV 2)**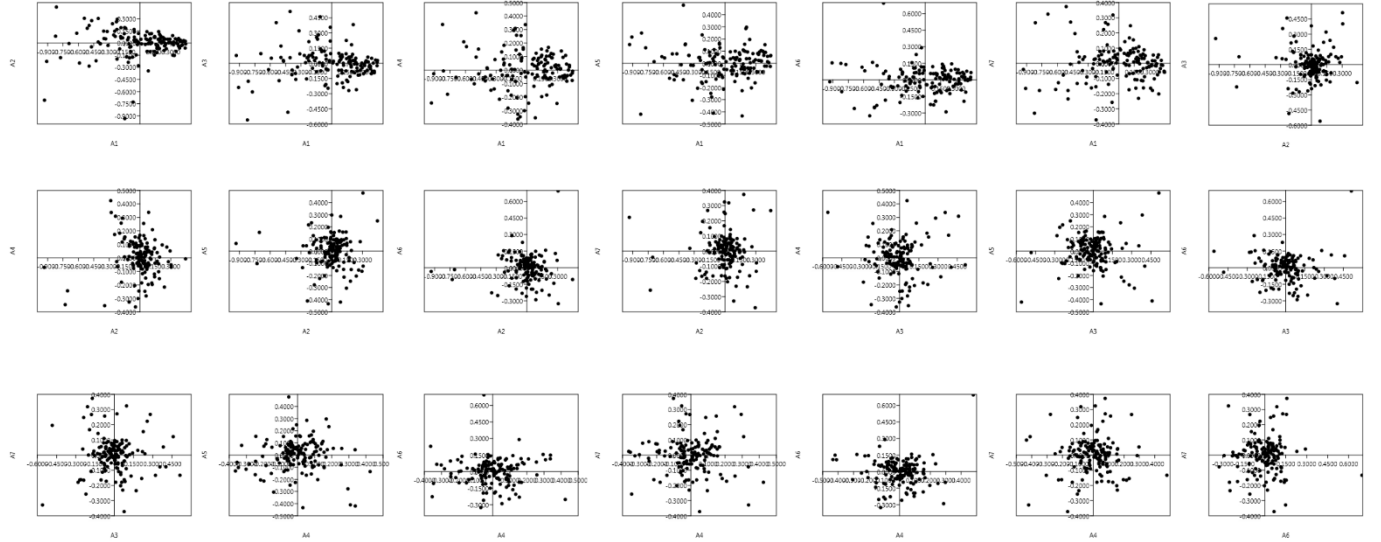**Figure S7.** Coding sequences of MH320551 and MH320550.

**MH320556 (MCV 2)**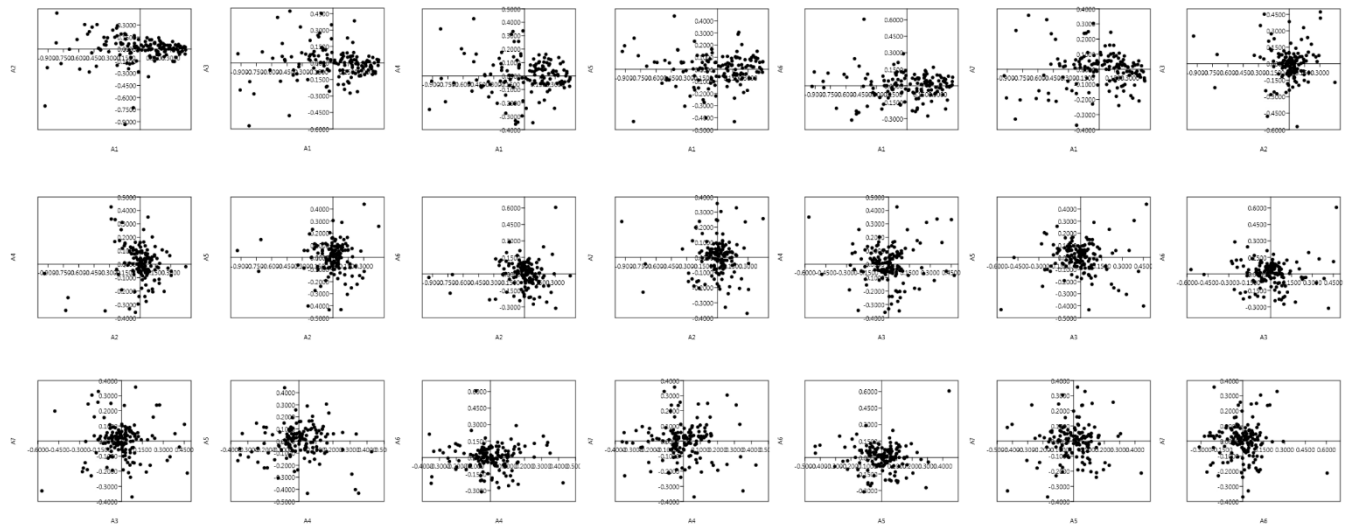**KY040274 (MCV 2)**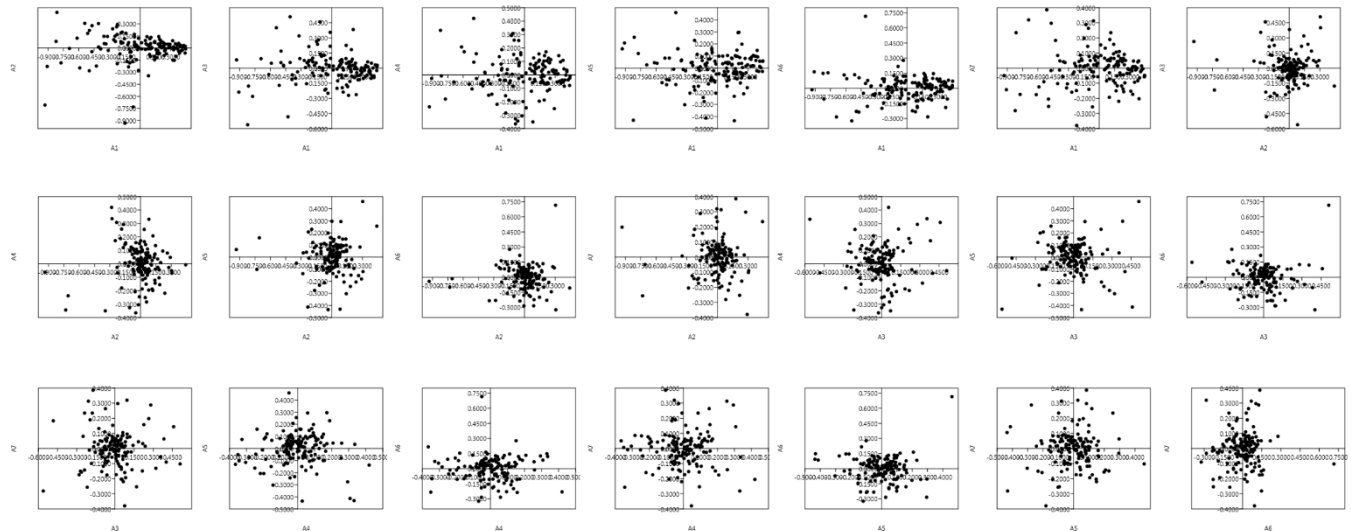

**Figure S8.** Coding sequences of MH320556 and KY040274.
